# Supplementary material for: Suppression of Tumorigenicity 2 in Heart Failure With Preserved Ejection Fraction
Source: PubMed Central journal article supplement — J Am Heart Assoc. 2017 Feb 18;6(2):e004382. doi: 10.1161/JAHA.116.004382 (PMC5523750; doi:10.1161/jaha.116.004382), 2017-02-18
Supplement: JAH3-6-e004382-s001.pdf [file JAH3-6-e004382-s001.pdf]

# **SUPPLEMENTAL MATERIAL**

**Table S1.** Characteristics of patients with or without stored serum for ST2 levels

|                                       | Have ST2<br>(n=174) | Missing ST2<br>(n=42) | p-value |
|---------------------------------------|---------------------|-----------------------|---------|
| Male                                  | 86 (49)             | 26 (62)               | 0.15    |
| Age, y                                | 68 (62 - 77)        | 70 (62 - 80)          | 0.41    |
| Body Mass Index, Kg/m <sup>2</sup>    | 32.9 (28.4 – 38.8)  | 33.6 (27.9 – 40.9)    | 0.79    |
| Body Surface Area, m <sup>2</sup>     | 2.11 (1.94 - 2.29)  | 2.10 (1.88 - 2.33)    | 0.74    |
| HF hospitalization                    | 55 (32)             | 24 (57)               | 0.002   |
| <b>Comorbidities</b>                  |                     |                       |         |
| Hypertension                          | 146 (84)            | 37 (88)               | 0.50    |
| Ischemic heart disease                | 67 (39)             | 17 (40)               | 0.81    |
| Atrial fibrillation                   | 85 (49)             | 26 (62)               | 0.13    |
| COPD                                  | 32 (18)             | 10 (24)               | 0.43    |
| Diabetes mellitus                     | 71 (41)             | 22 (52)               | 0.17    |
| Creatinine, mg/dl                     | 1.1 (0.8 - 1.3)     | 1.3 (0.9 - 1.7)       | 0.005   |
| Cystatin-C, mg/l                      | 1.25 (1.04 - 1.66)  | 1.65 (1.19 - 1.95)    | 0.005   |
| <b>Medications</b>                    |                     |                       |         |
| ACE inhibitor or ARB                  | 116 (67)            | 36 (86)               | 0.015   |
| Aldosterone antagonist                | 19 (11)             | 4 (10)                | 1.00    |
| Beta blocker                          | 127 (73)            | 37 (88)               | 0.039   |
| Loop diuretic                         | 130 (75)            | 36 (86)               | 0.13    |
| <b>Congestion and Quality of Life</b> |                     |                       |         |
| NT-proBNP, pg/ml                      | 633 (219-1372)      | 1334 (499 – 2350)     | 0.004   |
| Elevated JVP (n=209)                  | 73 (43)             | 22 (54)               | 0.69    |
| ≥ Moderate edema                      | 35 (20)             | 9 (21)                | 0.45    |
| NYHA class II                         | 85 (49)             | 16 (38)               | 0.21    |
| MLHFQ Score                           | 43 (30 - 63)        | 45 (22 - 58)          | 0.69    |

Abbreviations: ACE, Angiotensin Converting Enzyme; ARB, Angiotensin Receptor Blocker; COPD, Chronic Obstructive Pulmonary Disease; HF, Heart Failure; NT-proBNP, N-terminal pro-brain natriuretic peptide; JVP, Jugular Venous Pressure; MLHFQ, Minnesota Living with Heart Failure Questionnaire; NYHA, New York Heart Association

**Table S2.** Association of ST2 with LV systolic function and geometry by cardiac magnetic resonance imaging

|                                 | N* | Low ST2 Tertile<br>(n=58) | Mid ST2 Tertile<br>(n=58) | High ST2 Tertile<br>(n=58) | p-value | p-<br>value† |
|---------------------------------|----|---------------------------|---------------------------|----------------------------|---------|--------------|
| <b>CMRI</b>                     |    |                           |                           |                            |         |              |
| Ejection fraction, %            | 96 | 67 (62 - 71)              | 65 (58 - 70)              | 67 (53 - 70)               | 0.54    | 0.53         |
| LVEDV / BSA, ml/ m <sup>2</sup> | 96 | 54 (46 - 63)              | 55 (43 - 64)              | 53 (46 - 66)               | 1.00    | 0.93         |
| LV mass/LV volume, g/ml         | 96 | 1.05 (0.87 - 1.31)        | 1.23 (1.00 - 1.71)        | 1.17 (0.99 - 1.32)         | 0.07    | 0.36         |
| LV mass/BSA, g/m <sup>2</sup>   | 96 | 56 (52 - 65)              | 69 (53 - 84)              | 62 (56 - 79)               | 0.06    | 0.29         |

Data are median (IQR); \* total N with data; † Adjusted for sex

Abbreviations: LV, Left Ventricle; LVEDV, Left Ventricular End Diastolic Volume

**Table S3.** Association of NT-proBNP levels with cardiac structure and function

|                                                   | NT-proBNP* |                                 |                    |
|---------------------------------------------------|------------|---------------------------------|--------------------|
|                                                   | N          | Parameter estimate per log unit | Unadjusted p-value |
| <b><i>Diastolic function parameters</i></b>       |            |                                 |                    |
| Log-transformed E/A ratio                         | 117        | 0.21637                         | <0.0001            |
| Log-transformed Medial E/e'                       | 154        | 0.16177                         | <0.0001            |
| Deceleration time, ms                             | 158        | -9.28482                        | 0.0004             |
| LA volume/BSA, ml/m <sup>2</sup>                  | 122        | 6.99614                         | <0.0001            |
| <b><i>LV structure and systolic function</i></b>  |            |                                 |                    |
| Ejection fraction                                 | 172        | -0.32805                        | 0.45               |
| Log-transformed relative wall thickness           | 127        | 0.04831                         | 0.003              |
| LV mass/BSA, g/m <sup>2</sup> (echo)              | 127        | 3.94840                         | 0.041              |
| <b><i>Right ventricular load and function</i></b> |            |                                 |                    |
| PASP, mmHg                                        | 112        | 2.70231                         | 0.005              |
| TAPSE, mm                                         | 171        | -2.03747                        | <0.0001            |

\* Linear regression model with the imaging measure as the dependent variable and log-transformed NT-proBNP as the independent variable.

Abbreviations: LA, Left Atrium; LV, Left Ventricle; PASP, Pulmonary Artery Systolic Pressure; TAPSE, Tricuspid Annular Plane Systolic Excursion
